# Supplementary material for: Comprehensive Screening of Gene Function and Networks by DNA Microarray Analysis in Japanese Patients with Idiopathic Portal Hypertension
Source: Hindawi journal article supplement (doi:10.1155/2015/349215), 2015-01-01
Supplement: f1 [file 349215.f1.pdf]

SUPPLEMENTARY TABLE 1: All 113 genes showing significantly increased or decreased expression in patients with IPH on the basis of the iReport

| <b>Symbol</b>                                                                                                      | <b>Fold Change</b> | <b>Molecular Function</b>  | <b>Location</b>     | <b>Pathways</b> | <b>Processes</b> | <b>Diseases</b> |
|--------------------------------------------------------------------------------------------------------------------|--------------------|----------------------------|---------------------|-----------------|------------------|-----------------|
| CYP4F3: cytochrome P450, family 4, subfamily F, polypeptide 3                                                      | 7.012              | enzyme                     | Cytoplasm           | 1               | 3                | 1               |
| C7: complement component 7                                                                                         | 2.666              | other                      | Extracellular Space | 2               | 0                | 10              |
| FOLH1: folate hydrolase (prostate-specific membrane antigen) 1                                                     | 2.631              | peptidase                  | Plasma Membrane     | 0               | 2                | 8               |
| ABCA8: ATP-binding cassette, sub-family A (ABC1), member 8                                                         | 2.393              | transporter                | Plasma Membrane     | 0               | 0                | 10              |
| OIT3: oncoprotein induced transcript 3                                                                             | 2.376              | other                      | Nucleus             | 0               | 0                | 4               |
| NPR3 (includes EG:18162): natriuretic peptide receptor C/guanylate cyclase C (atrionatriuretic peptide receptor C) | 2.253              | G-protein coupled receptor | Plasma Membrane     | 2               | 3                | 5               |
| SERPINA5: serpin peptidase inhibitor, clade A (alpha-1 antiproteinase, antitrypsin),                               | 2.245              | other                      | Extracellular Space | 1               | 8                | 11              |

|                                                      |       |                       |           |    |    |    |
|------------------------------------------------------|-------|-----------------------|-----------|----|----|----|
| member 5                                             |       |                       |           |    |    |    |
| PEG3: paternally expressed 3                         | 2.235 | kinase                | Nucleus   | 0  | 0  | 13 |
| PCDHGB5: protocadherin gamma subfamily B, 5          | 2.184 | other                 | Unknown   | 0  | 0  | 0  |
| TPD52L1: tumor protein D52-like 1                    | 2.181 | other                 | Cytoplasm | 0  | 2  | 5  |
| MARC1: mitochondrial amidoxime reducing component 1  | 2.087 | enzyme                | Cytoplasm | 1  | 0  | 2  |
| MTCP1NB: mature T-cell proliferation 1 neighbor      | 2.057 | other                 | Cytoplasm | 0  | 0  | 0  |
| PAIP1: poly(A) binding protein interacting protein 1 | 2.053 | translation regulator | Cytoplasm | 2  | 0  | 0  |
| PLA2G10: phospholipase A2, group X                   | 1.984 | enzyme                | Cytoplasm | 17 | 39 | 6  |
| LRRTM3: leucine rich repeat transmembrane neuronal 3 | 1.966 | other                 | Unknown   | 0  | 0  | 0  |
| PCDHGC4: protocadherin gamma                         | 1.858 | other                 | Unknown   | 0  | 0  | 0  |

|                                                                                                       |       |                            |                     |    |    |    |
|-------------------------------------------------------------------------------------------------------|-------|----------------------------|---------------------|----|----|----|
| subfamily C, 4                                                                                        |       |                            |                     |    |    |    |
| PCDHGA12: protocadherin gamma subfamily A, 12                                                         | 1.789 | other                      | Plasma Membrane     | 0  | 0  | 0  |
| PCDHA12: protocadherin alpha 12                                                                       | 1.777 | other                      | Plasma Membrane     | 0  | 0  | 0  |
| NFIA: nuclear factor I/A                                                                              | 1.772 | transcription regulator    | Nucleus             | 1  | 7  | 1  |
| OR4N4: olfactory receptor, family 4, subfamily N, member 4                                            | 1.706 | G-protein coupled receptor | Plasma Membrane     | 0  | 0  | 0  |
| SPRED2: sprouty-related, EVH1 domain containing 2                                                     | 1.705 | cytokine                   | Extracellular Space | 0  | 2  | 1  |
| TNFRSF11B: tumor necrosis factor receptor superfamily, member 11b                                     | 1.684 | transmembrane receptor     | Plasma Membrane     | 19 | 40 | 28 |
| MLLT4: myeloid/lymphoid or mixed-lineage leukemia (trithorax homolog, Drosophila); translocated to, 4 | 1.635 | other                      | Nucleus             | 4  | 8  | 4  |
| MANSC1: MANSC domain containing 1                                                                     | 1.63  | other                      | Unknown             | 0  | 0  | 0  |

|                                                          |       |        |                     |   |   |    |
|----------------------------------------------------------|-------|--------|---------------------|---|---|----|
| SNX33: sorting nexin 33                                  | 1.586 | other  | Cytoplasm           | 0 | 1 | 0  |
| MID2: midline 2                                          | 1.576 | other  | Cytoplasm           | 0 | 0 | 0  |
| YBEY: ybeY metallopeptidase (putative)                   | 1.544 | other  | Cytoplasm           | 0 | 0 | 0  |
| SCRN3: secernin 3                                        | 1.539 | other  | Unknown             | 0 | 0 | 0  |
| TPRG1L: tumor protein p63 regulated 1-like               | 1.537 | other  | Cytoplasm           | 0 | 0 | 0  |
| IPP: intracisternal A particle-promoted polypeptide      | 1.536 | other  | Cytoplasm           | 0 | 1 | 0  |
| LINC00238: long intergenic non-protein coding RNA 238    | 1.533 | other  | Unknown             | 0 | 0 | 0  |
| ZMYND12: zinc finger, MYND-type containing 12            | 1.531 | other  | Unknown             | 0 | 0 | 0  |
| GPX3: glutathione peroxidase 3 (plasma)                  | 1.529 | enzyme | Extracellular Space | 2 | 0 | 14 |
| C1QTNF7: C1q and tumor necrosis factor related protein 7 | 1.52  | other  | Extracellular Space | 0 | 0 | 0  |

|                                                                                         |        |                            |                     |    |     |    |
|-----------------------------------------------------------------------------------------|--------|----------------------------|---------------------|----|-----|----|
| LOC286359: uncharacterized LOC286359                                                    | 1.513  | other                      | Unknown             | 0  | 0   | 0  |
| GSTA5: glutathione S-transferase alpha 5                                                | 1.504  | enzyme                     | Cytoplasm           | 6  | 0   | 0  |
| NUDT12: nudix (nucleoside diphosphate linked moiety X)-type motif 12                    | 1.504  | phosphatase                | Cytoplasm           | 1  | 0   | 0  |
| TGFB1 (includes EG:21803): transforming growth factor, beta 1                           | -1.501 | growth factor              | Extracellular Space | 33 | 239 | 46 |
| P2RY14: purinergic receptor P2Y, G-protein coupled, 14                                  | -1.51  | G-protein coupled receptor | Plasma Membrane     | 2  | 1   | 7  |
| TPTE2P2: transmembrane phosphoinositide 3-phosphatase and tensin homolog 2 pseudogene 2 | -1.516 | other                      | Unknown             | 0  | 0   | 0  |
| QTRTD1: queuine tRNA-ribosyltransferase domain containing 1                             | -1.521 | other                      | Cytoplasm           | 0  | 0   | 0  |
| SARNP: SAP domain containing ribonucleoprotein                                          | -1.543 | other                      | Nucleus             | 0  | 0   | 2  |

|                                                                     |        |             |                 |    |    |   |
|---------------------------------------------------------------------|--------|-------------|-----------------|----|----|---|
| UBE2D2: ubiquitin-conjugating enzyme<br>E2D 2                       | -1.544 | enzyme      | Cytoplasm       | 2  | 0  | 0 |
| RHOQ: ras homolog family member Q                                   | -1.546 | enzyme      | Plasma Membrane | 23 | 1  | 0 |
| CDK7: cyclin-dependent kinase 7                                     | -1.548 | kinase      | Nucleus         | 11 | 5  | 8 |
| ADA: adenosine deaminase                                            | -1.553 | enzyme      | Cytoplasm       | 2  | 47 | 8 |
| SEPT1: septin 1                                                     | -1.558 | enzyme      | Cytoplasm       | 3  | 0  | 0 |
| FOXRED2: FAD-dependent oxidoreductase<br>domain containing 2        | -1.562 | other       | Cytoplasm       | 0  | 0  | 0 |
| ENTPD4: ectonucleoside triphosphate<br>diphosphohydrolase 4         | -1.566 | enzyme      | Cytoplasm       | 2  | 2  | 1 |
| HSD17B7P2: hydroxysteroid (17-beta)<br>dehydrogenase 7 pseudogene 2 | -1.577 | other       | Unknown         | 0  | 0  | 0 |
| SLC38A11: solute carrier family 38,<br>member 11                    | -1.589 | transporter | Unknown         | 0  | 0  | 0 |
| ELOVL5: ELOVL fatty acid elongase 5                                 | -1.601 | enzyme      | Cytoplasm       | 0  | 3  | 0 |

|                                                                |        |                         |                 |    |    |    |
|----------------------------------------------------------------|--------|-------------------------|-----------------|----|----|----|
| ELMOD3: ELMO/CED-12 domain containing 3                        | -1.621 | other                   | Unknown         | 0  | 0  | 0  |
| EMB: embigin                                                   | -1.623 | other                   | Plasma Membrane | 0  | 0  | 0  |
| ATP2A3: ATPase, Ca <sup>++</sup> transporting, ubiquitous      | -1.63  | transporter             | Cytoplasm       | 5  | 0  | 0  |
| PRO0611: PRO0611 protein                                       | -1.637 | other                   | Unknown         | 0  | 0  | 0  |
| E2F5: E2F transcription factor 5, p130-binding                 | -1.637 | transcription regulator | Nucleus         | 12 | 12 | 4  |
| ABCC1: ATP-binding cassette, sub-family C (CFTR/MRP), member 1 | -1.647 | transporter             | Plasma Membrane | 3  | 48 | 13 |
| TMEM120B: transmembrane protein 120B                           | -1.657 | other                   | Unknown         | 0  | 0  | 0  |
| EDNRA: endothelin receptor type A                              | -1.658 | transmembrane receptor  | Plasma Membrane | 4  | 33 | 16 |
| SPDYE3: speedy homolog E3 (Xenopus laevis)                     | -1.659 | other                   | Unknown         | 0  | 0  | 0  |
| C11orf39: chromosome 11 open reading                           | -1.665 | other                   | Unknown         | 0  | 0  | 0  |

|                                                                     |        |                            |                 |   |     |    |
|---------------------------------------------------------------------|--------|----------------------------|-----------------|---|-----|----|
| frame 39                                                            |        |                            |                 |   |     |    |
| PTGER2: prostaglandin E receptor 2<br>(subtype EP2), 53kDa          | -1.675 | G-protein coupled receptor | Plasma Membrane | 6 | 31  | 17 |
| MGC27345: uncharacterized protein<br>MGC27345                       | -1.769 | other                      | Unknown         | 0 | 0   | 0  |
| SNORD80: small nucleolar RNA, C/D box<br>80                         | -1.789 | other                      | Unknown         | 0 | 0   | 0  |
| SNORD36A: small nucleolar RNA, C/D<br>box 36A                       | -1.79  | other                      | Unknown         | 0 | 0   | 0  |
| CD44 (includes EG:100330801): CD44<br>molecule (Indian blood group) | -1.797 | enzyme                     | Plasma Membrane | 7 | 117 | 28 |
| LRRN1: leucine rich repeat neuronal 1                               | -1.827 | other                      | Unknown         | 0 | 0   | 0  |
| HIF1AN: hypoxia inducible factor 1, alpha<br>subunit inhibitor      | -1.849 | enzyme                     | Nucleus         | 1 | 0   | 0  |
| TNFAIP8: tumor necrosis factor,                                     | -1.851 | other                      | Cytoplasm       | 0 | 9   | 0  |



|                                                                             |        |             |                     |   |    |   |
|-----------------------------------------------------------------------------|--------|-------------|---------------------|---|----|---|
| alpha-induced protein 8                                                     |        |             |                     |   |    |   |
| CYFIP2: cytoplasmic FMR1 interacting protein 2                              | -1.852 | other       | Cytoplasm           | 2 | 0  | 0 |
| IGHD: immunoglobulin heavy constant delta                                   | -1.868 | other       | Extracellular Space | 3 | 0  | 0 |
| LIX1: Lix1 homolog (chicken)                                                | -1.902 | other       | Unknown             | 0 | 0  | 0 |
| MELK: maternal embryonic leucine zipper kinase                              | -1.962 | kinase      | Cytoplasm           | 0 | 5  | 5 |
| IPLL1/IPLL5: immunoglobulin lambda-like polypeptide 1                       | -1.964 | other       | Plasma Membrane     | 1 | 21 | 9 |
| HIST1H4A (includes others): histone cluster 1, H4a                          | -1.971 | other       | Nucleus             | 0 | 1  | 6 |
| SLC4A7: solute carrier family 4, sodium bicarbonate cotransporter, member 7 | -1.971 | transporter | Plasma Membrane     | 0 | 2  | 0 |
| HSPH1: heat shock 105kDa/110kDa protein                                     | -1.989 | other       | Cytoplasm           | 2 | 4  | 0 |

|                                                                                     |        |           |                     |   |    |    |
|-------------------------------------------------------------------------------------|--------|-----------|---------------------|---|----|----|
| 1                                                                                   |        |           |                     |   |    |    |
| TSGA10: testis specific, 10                                                         | -2.017 | other     | Cytoplasm           | 0 | 0  | 0  |
| WASH3P: WAS protein family homolog 3<br>pseudogene                                  | -2.033 | other     | Plasma Membrane     | 0 | 0  | 0  |
| MMP12: matrix metalloproteinase 12<br>(macrophage elastase)                         | -2.036 | peptidase | Extracellular Space | 4 | 21 | 12 |
| RAB30: RAB30, member RAS oncogene<br>family                                         | -2.045 | enzyme    | Cytoplasm           | 0 | 0  | 0  |
| SNORD44: small nucleolar RNA, C/D box<br>44                                         | -2.062 | other     | Unknown             | 0 | 0  | 0  |
| SNORD53: small nucleolar RNA, C/D box<br>53                                         | -2.122 | other     | Unknown             | 0 | 0  | 0  |
| APOBEC3F: apolipoprotein B mRNA<br>editing enzyme, catalytic polypeptide-like<br>3F | -2.126 | enzyme    | Cytoplasm           | 1 | 0  | 1  |

|                                                                        |        |                         |                 |    |     |    |
|------------------------------------------------------------------------|--------|-------------------------|-----------------|----|-----|----|
| SNORA24: small nucleolar RNA, H/ACA<br>box 24                          | -2.137 | other                   | Unknown         | 0  | 0   | 0  |
| HIST1H2AG (includes others): histone<br>cluster 1, H2ag                | -2.14  | other                   | Nucleus         | 0  | 0   | 0  |
| RASGRP1: RAS guanyl releasing protein 1<br>(calcium and DAG-regulated) | -2.16  | other                   | Cytoplasm       | 3  | 28  | 7  |
| POF1B: premature ovarian failure, 1B                                   | -2.191 | other                   | Plasma Membrane | 0  | 0   | 0  |
| TBC1D3P2: TBC1 domain family, member<br>3 pseudogene 2                 | -2.198 | other                   | Unknown         | 0  | 0   | 0  |
| CD28: CD28 molecule                                                    | -2.208 | other                   | Plasma Membrane | 17 | 101 | 14 |
| HIST1H2BM: histone cluster 1, H2bm                                     | -2.3   | other                   | Nucleus         | 0  | 0   | 0  |
| MKI67: antigen identified by monoclonal<br>antibody Ki-67              | -2.314 | other                   | Nucleus         | 0  | 2   | 16 |
| PTTG1: pituitary tumor-transforming 1                                  | -2.441 | transcription regulator | Nucleus         | 1  | 20  | 15 |
| HIST2H2BE (includes others): histone                                   | -2.452 | other                   | Nucleus         | 0  | 0   | 4  |

|                                                                   |        |                            |                 |   |    |    |
|-------------------------------------------------------------------|--------|----------------------------|-----------------|---|----|----|
| cluster 2, H2be                                                   |        |                            |                 |   |    |    |
| SNORA70E: small nucleolar RNA, H/ACA box 70E (retrotransposed)    | -2.487 | other                      | Unknown         | 0 | 0  | 0  |
| CXCR4: chemokine (C-X-C motif) receptor 4                         | -2.512 | G-protein coupled receptor | Plasma Membrane | 8 | 87 | 29 |
| LOC100507433: uncharacterized<br>LOC100507433                     | -2.526 | other                      | Unknown         | 0 | 0  | 0  |
| ZNF439: zinc finger protein 439                                   | -2.55  | other                      | Nucleus         | 0 | 0  | 0  |
| SLAMF1: signaling lymphocytic activation molecule family member 1 | -2.564 | transmembrane receptor     | Plasma Membrane | 1 | 18 | 4  |
| LAX1: lymphocyte transmembrane adaptor 1                          | -2.583 | other                      | Cytoplasm       | 0 | 22 | 0  |
| DEFB131: defensin, beta 131                                       | -2.608 | other                      | Unknown         | 0 | 0  | 0  |
| SNORA50: small nucleolar RNA, H/ACA box 50                        | -2.676 | other                      | Unknown         | 0 | 0  | 0  |

|                                                           |        |                        |                 |    |    |   |
|-----------------------------------------------------------|--------|------------------------|-----------------|----|----|---|
| FCRL2: Fc receptor-like 2                                 | -2.807 | other                  | Unknown         | 0  | 0  | 0 |
| CD37: CD37 molecule                                       | -2.834 | other                  | Plasma Membrane | 0  | 11 | 0 |
| CD79A: CD79a molecule,<br>immunoglobulin-associated alpha | -2.918 | transmembrane receptor | Plasma Membrane | 10 | 19 | 9 |
| GNLY: granulysin                                          | -2.991 | other                  | Cytoplasm       | 0  | 28 | 1 |
| PARP15: poly (ADP-ribose) polymerase<br>family, member 15 | -3.068 | other                  | Unknown         | 1  | 0  | 0 |
| GOLGA8A/GOLGA8B: golgin A8 family,<br>member A            | -3.418 | other                  | Cytoplasm       | 0  | 0  | 0 |
| STAP1: signal transducing adaptor family<br>member 1      | -3.816 | other                  | Cytoplasm       | 0  | 1  | 6 |
| TMEM156: transmembrane protein 156                        | -3.847 | other                  | Unknown         | 0  | 0  | 0 |
| ERAP2: endoplasmic reticulum<br>aminopeptidase 2          | -5.332 | peptidase              | Cytoplasm       | 0  | 1  | 6 |
